# Supplementary material for: A hybrid deep forest-based method for predicting synergistic drug combinations
Source: PubMed Central journal article supplement — Cell Rep Methods. 2023 Feb 21;3(2):100411. doi: 10.1016/j.crmeth.2023.100411 (PMC10014304; doi:10.1016/j.crmeth.2023.100411), 2023-02-21
Supplement: mmc1.pdf [file mmc1.pdf]

**Cell Reports Methods, Volume 3**

**Supplemental information**

**A hybrid deep forest-based method  
for predicting synergistic drug combinations**

**Lianlian Wu, Jie Gao, Yixin Zhang, Binsheng Sui, Yuqi Wen, Qingqiang Wu, Kunhong Liu, Song He, and Xiaochen Bo**

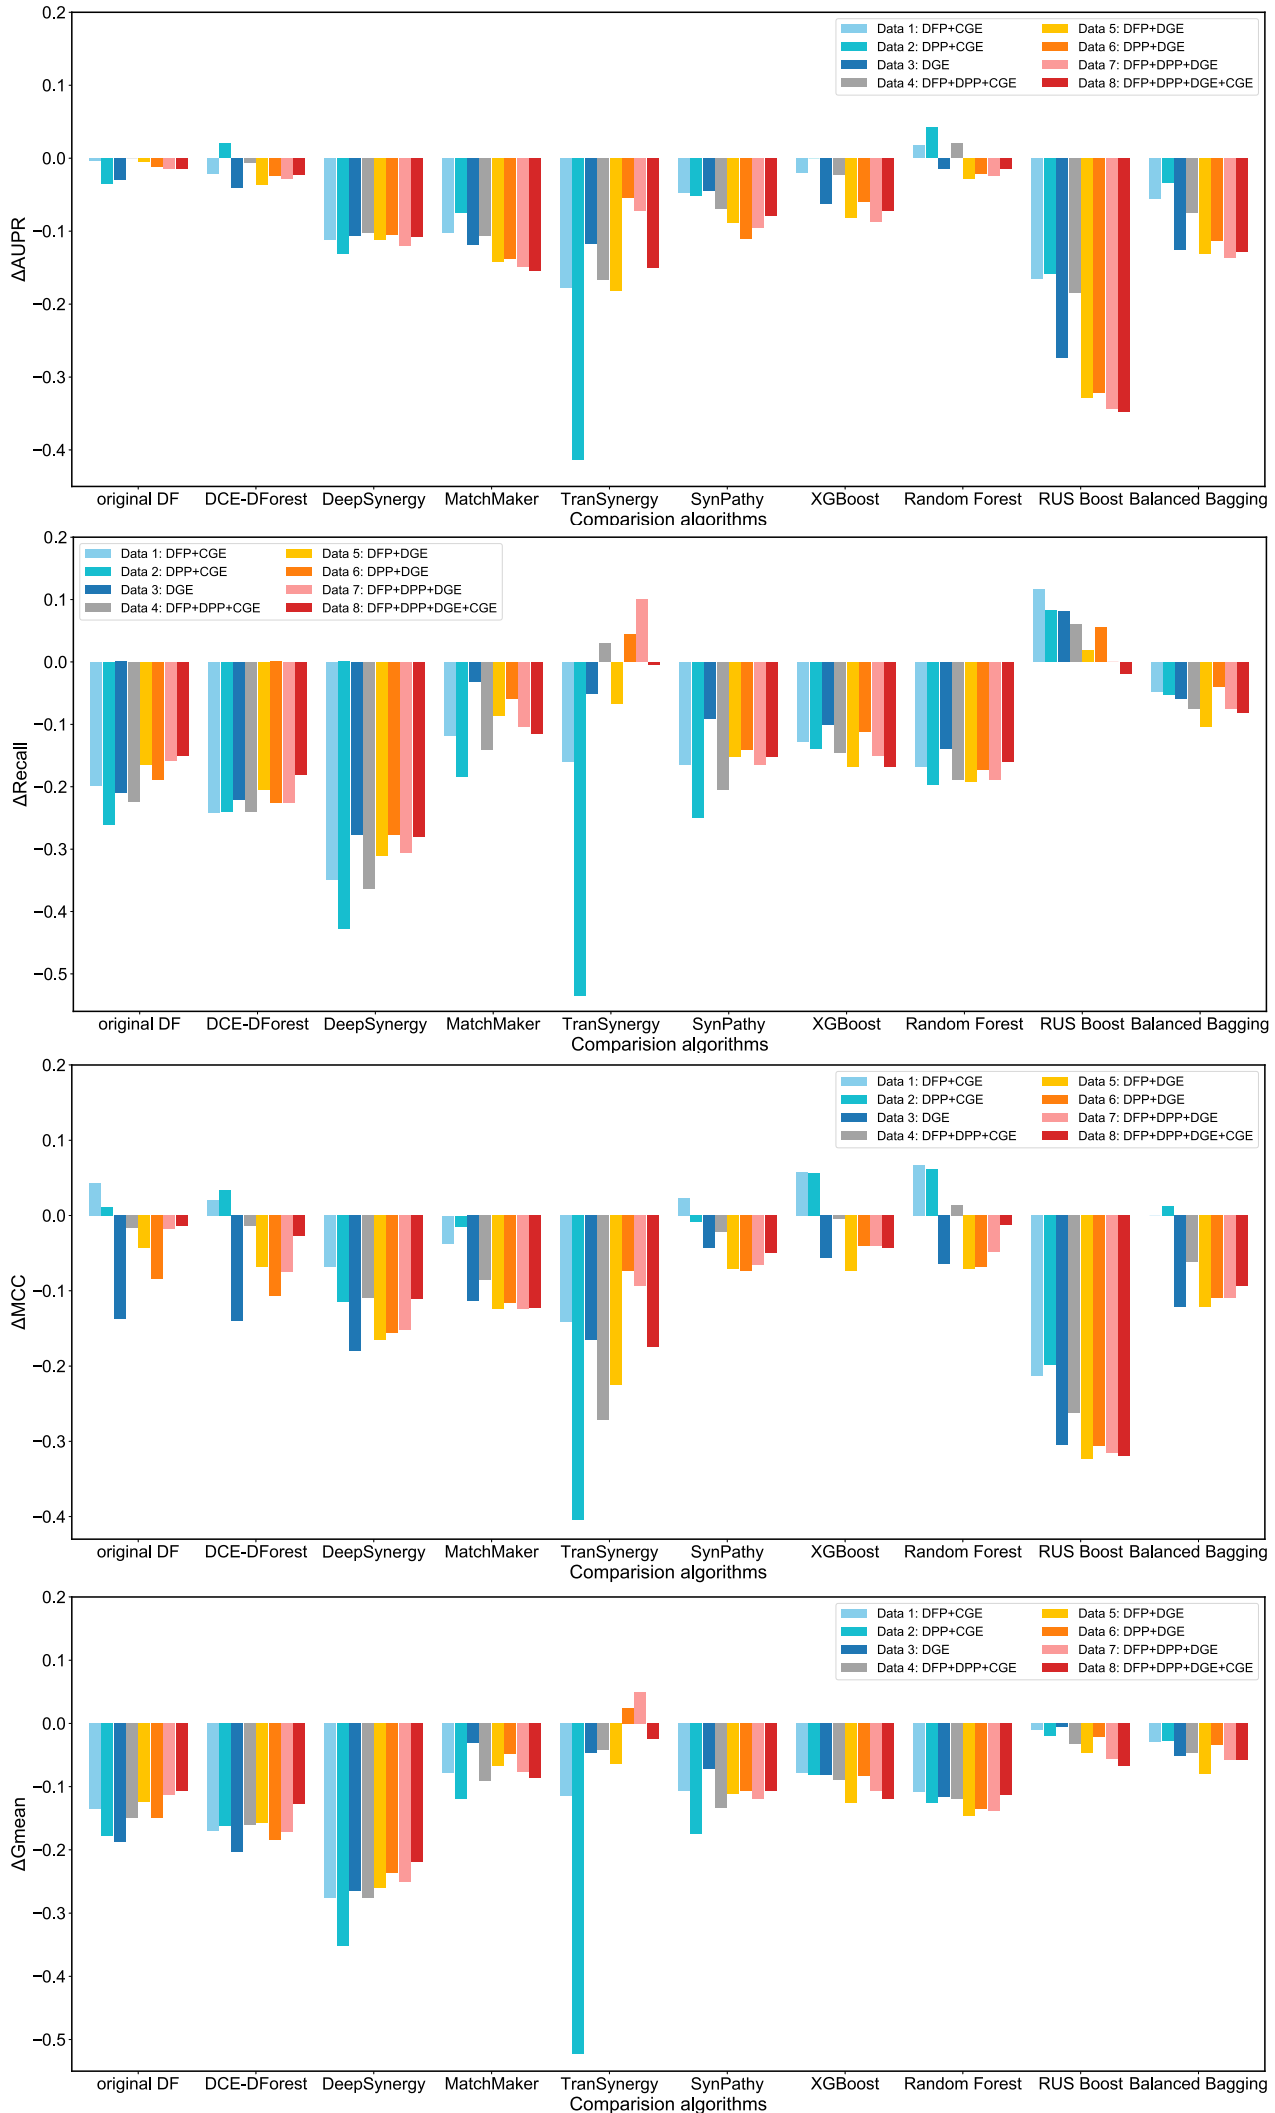

Figure S1. The performance of all algorithms under different datasets, related to Figure 2.

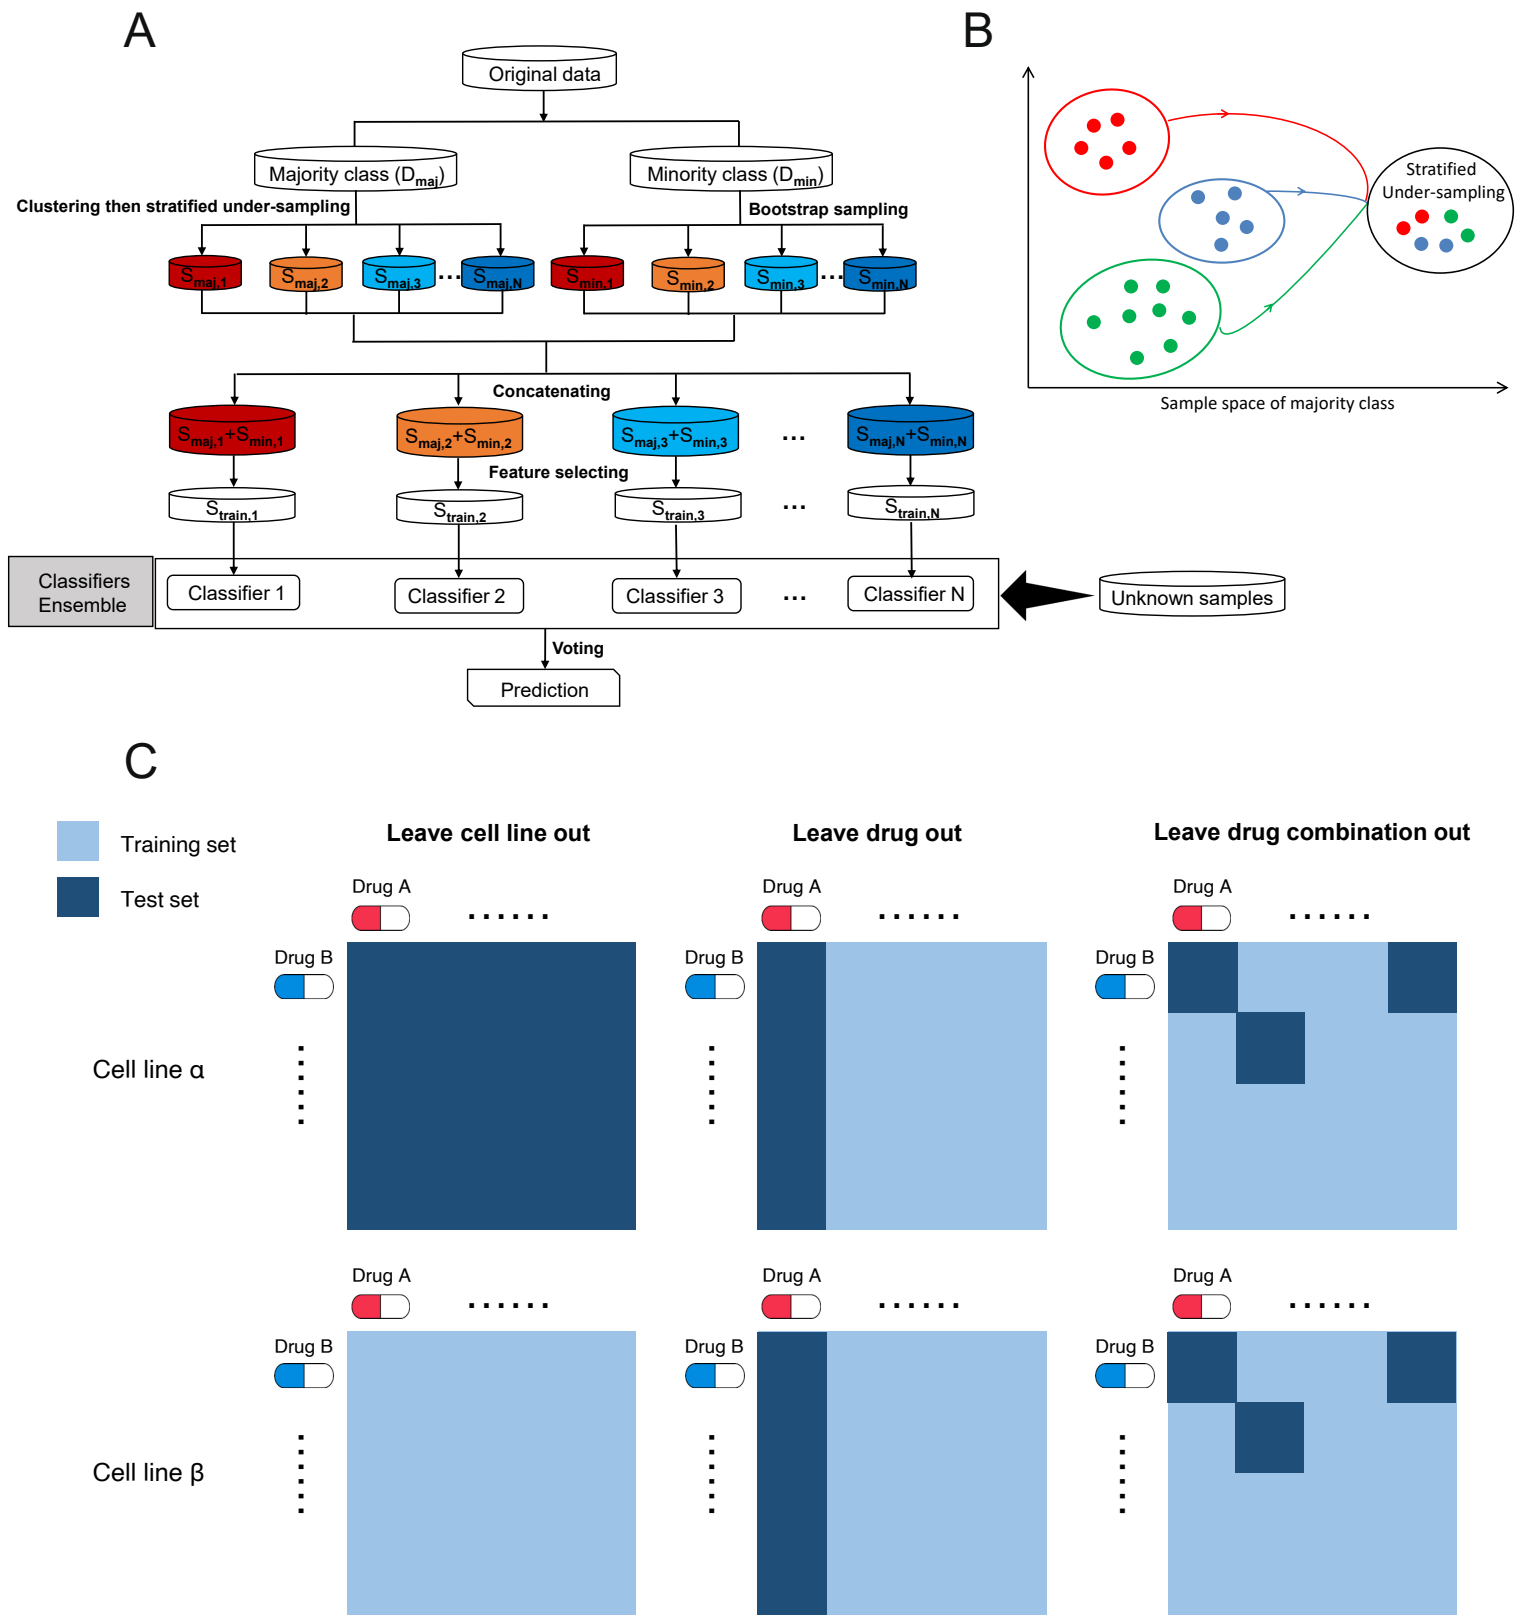

Figure S2. The diagram of ForSyn's random forest unit and three cross-validation strategies, related to STAR Methods.

(A) The framework of random forest unit based on clustering and stratified under-sampling.

(B) The diagram of stratified under-sampling based on clustering.

(C) The diagram of three cross-validation strategies, i.e., leave-cell-line-out, leave-drug-out and leave-drug-combination-out cross-validation.

Table S1. Performance comparison of all algorithms based on F1-score, related to Figure 2.

|              | ForSyn                 | Original DF            | DCE-DForest            | Deep Synergy            | Match Maker            | Tran Synergy            | SynPathy               | XGBoost                | Random Forest          | RUS Boost               | Balanced Bagging       | DeepDDS-GCN | DeepDDS-GAT |
|--------------|------------------------|------------------------|------------------------|-------------------------|------------------------|-------------------------|------------------------|------------------------|------------------------|-------------------------|------------------------|-------------|-------------|
| Data 1       | 0.499 <sub>(3.5)</sub> | 0.487 <sub>(6.0)</sub> | 0.451 <sub>(8.0)</sub> | 0.330 <sub>(10.0)</sub> | 0.459 <sub>(7.0)</sub> | 0.367 <sub>(9.0)</sub>  | 0.491 <sub>(5.0)</sub> | 0.528 <sub>(1.0)</sub> | 0.518 <sub>(2.0)</sub> | 0.269 <sub>(11.0)</sub> | 0.499 <sub>(3.5)</sub> | /           | /           |
| Data 2       | 0.496 <sub>(4.0)</sub> | 0.451 <sub>(7.0)</sub> | 0.473 <sub>(5.0)</sub> | 0.262 <sub>(10.0)</sub> | 0.466 <sub>(6.0)</sub> | 0.076 <sub>(11.0)</sub> | 0.445 <sub>(8.0)</sub> | 0.533 <sub>(1.0)</sub> | 0.514 <sub>(2.0)</sub> | 0.282 <sub>(9.0)</sub>  | 0.510 <sub>(3.0)</sub> | /           | /           |
| Data 3       | 0.519 <sub>(1.0)</sub> | 0.328 <sub>(8.0)</sub> | 0.315 <sub>(9.0)</sub> | 0.248 <sub>(10.0)</sub> | 0.427 <sub>(4.0)</sub> | 0.384 <sub>(7.0)</sub>  | 0.451 <sub>(2.0)</sub> | 0.442 <sub>(3.0)</sub> | 0.411 <sub>(6.0)</sub> | 0.247 <sub>(11.0)</sub> | 0.415 <sub>(5.0)</sub> | /           | /           |
| Data 4       | 0.529 <sub>(2.5)</sub> | 0.493 <sub>(6.0)</sub> | 0.486 <sub>(7.0)</sub> | 0.357 <sub>(9.0)</sub>  | 0.470 <sub>(8.0)</sub> | 0.278 <sub>(11.0)</sub> | 0.500 <sub>(4.0)</sub> | 0.534 <sub>(1.0)</sub> | 0.529 <sub>(2.5)</sub> | 0.283 <sub>(10.0)</sub> | 0.497 <sub>(5.0)</sub> | /           | /           |
| Data 5       | 0.568 <sub>(1.0)</sub> | 0.483 <sub>(2.0)</sub> | 0.445 <sub>(8.0)</sub> | 0.324 <sub>(10.0)</sub> | 0.455 <sub>(5.5)</sub> | 0.367 <sub>(9.0)</sub>  | 0.475 <sub>(3.0)</sub> | 0.466 <sub>(4.0)</sub> | 0.452 <sub>(7.0)</sub> | 0.263 <sub>(11.0)</sub> | 0.455 <sub>(5.5)</sub> | /           | /           |
| Data 6       | 0.551 <sub>(1.0)</sub> | 0.419 <sub>(8.0)</sub> | 0.381 <sub>(9.0)</sub> | 0.320 <sub>(10.0)</sub> | 0.447 <sub>(6.0)</sub> | 0.494 <sub>(2.0)</sub>  | 0.452 <sub>(5.0)</sub> | 0.485 <sub>(3.0)</sub> | 0.436 <sub>(7.0)</sub> | 0.264 <sub>(11.0)</sub> | 0.456 <sub>(4.0)</sub> | /           | /           |
| Data 7       | 0.564 <sub>(1.0)</sub> | 0.502 <sub>(2.0)</sub> | 0.431 <sub>(9.0)</sub> | 0.338 <sub>(10.0)</sub> | 0.447 <sub>(8.0)</sub> | 0.476 <sub>(4.0)</sub>  | 0.470 <sub>(5.0)</sub> | 0.493 <sub>(3.0)</sub> | 0.467 <sub>(6.0)</sub> | 0.264 <sub>(11.0)</sub> | 0.463 <sub>(7.0)</sub> | /           | /           |
| Data 8       | 0.572 <sub>(1.0)</sub> | 0.509 <sub>(2.0)</sub> | 0.488 <sub>(5.0)</sub> | 0.383 <sub>(10.0)</sub> | 0.444 <sub>(8.0)</sub> | 0.395 <sub>(9.0)</sub>  | 0.490 <sub>(4.0)</sub> | 0.486 <sub>(6.0)</sub> | 0.506 <sub>(3.0)</sub> | 0.257 <sub>(11.0)</sub> | 0.472 <sub>(7.0)</sub> | /           | /           |
| Graph Data   | /                      | /                      | /                      | /                       | /                      | /                       | /                      | /                      | /                      | /                       | /                      | 0.474       | 0.426       |
| Average Rank | (1.9)                  | (5.1)                  | (7.5)                  | (9.9)                   | (6.6)                  | (7.8)                   | (4.5)                  | (2.8)                  | (4.4)                  | (10.6)                  | (5.0)                  | /           | /           |

Note: The performance of the first 11 algorithms is evaluated on Data 1-8 in tabular formats. Deep-GCN and Deep-GAT are the graph neural network-based algorithms and are tested on an additional dataset, Graph Data. The value in parentheses represents the ranking value of the corresponding performance. Taking Data 8 as an example, the ForSyn on this dataset has the best performance (0.572) and is assigned a ranking value of 1.0; the performance of Random Forest is the second (0.521) and is assigned a ranking value of 2.0; the performance of cascade forest and XGBoost are the same (0.515), they occupy the third and fourth positions respectively, so their ranking values are uniformly assigned 3.5  $((3.0+4.0)/2)$ . The average rank of each algorithm is defined as the average of its ranks on all datasets.

Table S2. Performance comparison of all algorithms based on AUPR, related to Figure 2.

|              | ForSyn                 | Original DF            | DCE-DForest            | Deep Synergy           | MatchMaker              | TranSynergy             | SynPathy               | XGBoost                | Random Forest          | RUS Boost               | Balanced Bagging        | DeepDDS-GCN | DeepDDS-GAT |
|--------------|------------------------|------------------------|------------------------|------------------------|-------------------------|-------------------------|------------------------|------------------------|------------------------|-------------------------|-------------------------|-------------|-------------|
| Data 1       | 0.566 <sup>(2.0)</sup> | 0.562 <sup>(3.0)</sup> | 0.545 <sup>(5.0)</sup> | 0.454 <sup>(9.0)</sup> | 0.465 <sup>(8.0)</sup>  | 0.389 <sup>(11.0)</sup> | 0.518 <sup>(6.0)</sup> | 0.546 <sup>(4.0)</sup> | 0.583 <sup>(1.0)</sup> | 0.401 <sup>(10.0)</sup> | 0.511 <sup>(7.0)</sup>  | /           | /           |
| Data 2       | 0.551 <sup>(3.5)</sup> | 0.516 <sup>(6.0)</sup> | 0.571 <sup>(2.0)</sup> | 0.420 <sup>(9.0)</sup> | 0.477 <sup>(8.0)</sup>  | 0.138 <sup>(11.0)</sup> | 0.500 <sup>(7.0)</sup> | 0.551 <sup>(3.5)</sup> | 0.593 <sup>(1.0)</sup> | 0.392 <sup>(10.0)</sup> | 0.517 <sup>(5.0)</sup>  | /           | /           |
| Data 3       | 0.521 <sup>(1.0)</sup> | 0.492 <sup>(3.0)</sup> | 0.481 <sup>(4.0)</sup> | 0.415 <sup>(7.0)</sup> | 0.402 <sup>(9.0)</sup>  | 0.404 <sup>(8.0)</sup>  | 0.477 <sup>(5.0)</sup> | 0.459 <sup>(6.0)</sup> | 0.506 <sup>(2.0)</sup> | 0.247 <sup>(11.0)</sup> | 0.395 <sup>(10.0)</sup> | /           | /           |
| Data 4       | 0.581 <sup>(2.5)</sup> | 0.581 <sup>(2.5)</sup> | 0.575 <sup>(4.0)</sup> | 0.479 <sup>(8.0)</sup> | 0.475 <sup>(9.0)</sup>  | 0.414 <sup>(10.0)</sup> | 0.512 <sup>(6.0)</sup> | 0.559 <sup>(5.0)</sup> | 0.601 <sup>(1.0)</sup> | 0.397 <sup>(11.0)</sup> | 0.506 <sup>(7.0)</sup>  | /           | /           |
| Data 5       | 0.579 <sup>(1.0)</sup> | 0.574 <sup>(2.0)</sup> | 0.543 <sup>(4.0)</sup> | 0.468 <sup>(7.0)</sup> | 0.438 <sup>(9.0)</sup>  | 0.397 <sup>(10.0)</sup> | 0.491 <sup>(6.0)</sup> | 0.498 <sup>(5.0)</sup> | 0.551 <sup>(3.0)</sup> | 0.251 <sup>(11.0)</sup> | 0.448 <sup>(8.0)</sup>  | /           | /           |
| Data 6       | 0.565 <sup>(1.0)</sup> | 0.553 <sup>(2.0)</sup> | 0.541 <sup>(4.0)</sup> | 0.461 <sup>(7.0)</sup> | 0.428 <sup>(10.0)</sup> | 0.511 <sup>(5.0)</sup>  | 0.455 <sup>(8.0)</sup> | 0.505 <sup>(6.0)</sup> | 0.544 <sup>(3.0)</sup> | 0.244 <sup>(11.0)</sup> | 0.452 <sup>(9.0)</sup>  | /           | /           |
| Data 7       | 0.589 <sup>(1.0)</sup> | 0.575 <sup>(2.0)</sup> | 0.561 <sup>(4.0)</sup> | 0.469 <sup>(8.0)</sup> | 0.440 <sup>(10.0)</sup> | 0.517 <sup>(5.0)</sup>  | 0.494 <sup>(7.0)</sup> | 0.502 <sup>(6.0)</sup> | 0.565 <sup>(3.0)</sup> | 0.246 <sup>(11.0)</sup> | 0.452 <sup>(9.0)</sup>  | /           | /           |
| Data 8       | 0.591 <sup>(1.0)</sup> | 0.577 <sup>(2.0)</sup> | 0.568 <sup>(4.0)</sup> | 0.483 <sup>(7.0)</sup> | 0.437 <sup>(10.0)</sup> | 0.441 <sup>(9.0)</sup>  | 0.512 <sup>(6.0)</sup> | 0.519 <sup>(5.0)</sup> | 0.576 <sup>(3.0)</sup> | 0.244 <sup>(11.0)</sup> | 0.463 <sup>(8.0)</sup>  | /           | /           |
| Graph Data   | /                      | /                      | /                      | /                      | /                       | /                       | /                      | /                      | /                      | /                       | /                       | 0.508       | 0.464       |
| Average Rank | (1.6)                  | (2.8)                  | (3.9)                  | (7.8)                  | (9.1)                   | (8.6)                   | (6.4)                  | (5.1)                  | (2.1)                  | (10.8)                  | (7.9)                   | /           | /           |

Table S3. Performance comparison of all algorithms based on Recall, related to Figure 2.

|              | ForSyn                 | Original DF            | DCE-DForest             | Deep Synergy            | MatchMaker             | TranSynergy             | SynPathy               | XGBoost                | Random Forest          | RUS Boost              | Balanced Bagging       | DeepDD S-GCN | DeepDDS-GAT |
|--------------|------------------------|------------------------|-------------------------|-------------------------|------------------------|-------------------------|------------------------|------------------------|------------------------|------------------------|------------------------|--------------|-------------|
| Data 1       | 0.559 <sup>(2.0)</sup> | 0.361 <sup>(9.0)</sup> | 0.317 <sup>(10.0)</sup> | 0.210 <sup>(11.0)</sup> | 0.442 <sup>(4.0)</sup> | 0.400 <sup>(6.0)</sup>  | 0.395 <sup>(7.0)</sup> | 0.432 <sup>(5.0)</sup> | 0.392 <sup>(8.0)</sup> | 0.676 <sup>(1.0)</sup> | 0.511 <sup>(3.0)</sup> | /            | /           |
| Data 2       | 0.585 <sup>(2.0)</sup> | 0.325 <sup>(9.0)</sup> | 0.345 <sup>(7.0)</sup>  | 0.157 <sup>(10.0)</sup> | 0.402 <sup>(5.0)</sup> | 0.050 <sup>(11.0)</sup> | 0.335 <sup>(8.0)</sup> | 0.447 <sup>(4.0)</sup> | 0.389 <sup>(6.0)</sup> | 0.667 <sup>(1.0)</sup> | 0.533 <sup>(3.0)</sup> | /            | /           |
| Data 3       | 0.425 <sup>(2.0)</sup> | 0.215 <sup>(9.0)</sup> | 0.205 <sup>(10.0)</sup> | 0.149 <sup>(11.0)</sup> | 0.394 <sup>(3.0)</sup> | 0.375 <sup>(4.0)</sup>  | 0.335 <sup>(6.0)</sup> | 0.325 <sup>(7.0)</sup> | 0.287 <sup>(8.0)</sup> | 0.506 <sup>(1.0)</sup> | 0.367 <sup>(5.0)</sup> | /            | /           |
| Data 4       | 0.595 <sup>(3.0)</sup> | 0.371 <sup>(9.0)</sup> | 0.355 <sup>(10.0)</sup> | 0.233 <sup>(11.0)</sup> | 0.454 <sup>(5.0)</sup> | 0.625 <sup>(2.0)</sup>  | 0.390 <sup>(8.0)</sup> | 0.450 <sup>(6.0)</sup> | 0.406 <sup>(7.0)</sup> | 0.655 <sup>(1.0)</sup> | 0.520 <sup>(4.0)</sup> | /            | /           |
| Data 5       | 0.517 <sup>(2.0)</sup> | 0.352 <sup>(7.0)</sup> | 0.312 <sup>(10.0)</sup> | 0.207 <sup>(11.0)</sup> | 0.432 <sup>(4.0)</sup> | 0.450 <sup>(3.0)</sup>  | 0.365 <sup>(6.0)</sup> | 0.350 <sup>(8.0)</sup> | 0.325 <sup>(9.0)</sup> | 0.535 <sup>(1.0)</sup> | 0.414 <sup>(5.0)</sup> | /            | /           |
| Data 6       | 0.481 <sup>(3.0)</sup> | 0.292 <sup>(9.0)</sup> | 0.255 <sup>(10.0)</sup> | 0.205 <sup>(11.0)</sup> | 0.422 <sup>(5.0)</sup> | 0.525 <sup>(2.0)</sup>  | 0.340 <sup>(7.0)</sup> | 0.370 <sup>(6.0)</sup> | 0.309 <sup>(8.0)</sup> | 0.536 <sup>(1.0)</sup> | 0.441 <sup>(4.0)</sup> | /            | /           |
| Data 7       | 0.525 <sup>(2.5)</sup> | 0.367 <sup>(7.0)</sup> | 0.300 <sup>(10.0)</sup> | 0.220 <sup>(11.0)</sup> | 0.422 <sup>(5.0)</sup> | 0.625 <sup>(1.0)</sup>  | 0.360 <sup>(8.0)</sup> | 0.375 <sup>(6.0)</sup> | 0.336 <sup>(9.0)</sup> | 0.525 <sup>(2.5)</sup> | 0.451 <sup>(4.0)</sup> | /            | /           |
| Data 8       | 0.537 <sup>(1.0)</sup> | 0.387 <sup>(6.0)</sup> | 0.357 <sup>(10.0)</sup> | 0.258 <sup>(11.0)</sup> | 0.422 <sup>(5.0)</sup> | 0.533 <sup>(2.0)</sup>  | 0.385 <sup>(7.0)</sup> | 0.370 <sup>(9.0)</sup> | 0.377 <sup>(8.0)</sup> | 0.519 <sup>(3.0)</sup> | 0.456 <sup>(4.0)</sup> | /            | /           |
| Graph Data   | /                      | /                      | /                       | /                       | /                      | /                       | /                      | /                      | /                      | /                      | /                      | 0.442        | 0.364       |
| Average Rank | (2.2)                  | (8.1)                  | (9.6)                   | (10.9)                  | (4.5)                  | (3.9)                   | (7.1)                  | (6.4)                  | (7.9)                  | (1.4)                  | (4.0)                  | /            | /           |

Table S4. Performance comparison of all algorithms based on MCC, related to Figure 2.

|              | ForSyn                 | Original DF            | DCE-DForest            | Deep Synergy            | MatchMaker             | TranSynergy             | SynPathy               | XGBoost                | Random Forest          | RUS Boost               | Balanced Bagging       | DeepDDS-GCN | DeepDDS-S-GAT |
|--------------|------------------------|------------------------|------------------------|-------------------------|------------------------|-------------------------|------------------------|------------------------|------------------------|-------------------------|------------------------|-------------|---------------|
| Data 1       | 0.464 <sup>(6.5)</sup> | 0.507 <sup>(3.0)</sup> | 0.485 <sup>(5.0)</sup> | 0.395 <sup>(9.0)</sup>  | 0.427 <sup>(8.0)</sup> | 0.323 <sup>(10.0)</sup> | 0.488 <sup>(4.0)</sup> | 0.522 <sup>(2.0)</sup> | 0.531 <sup>(1.0)</sup> | 0.251 <sup>(11.0)</sup> | 0.464 <sup>(6.5)</sup> | /           | /             |
| Data 2       | 0.464 <sup>(6.0)</sup> | 0.475 <sup>(5.0)</sup> | 0.498 <sup>(3.0)</sup> | 0.349 <sup>(9.0)</sup>  | 0.449 <sup>(8.0)</sup> | 0.059 <sup>(11.0)</sup> | 0.455 <sup>(7.0)</sup> | 0.521 <sup>(2.0)</sup> | 0.526 <sup>(1.0)</sup> | 0.265 <sup>(10.0)</sup> | 0.477 <sup>(4.0)</sup> | /           | /             |
| Data 3       | 0.509 <sup>(1.0)</sup> | 0.372 <sup>(7.0)</sup> | 0.369 <sup>(8.0)</sup> | 0.329 <sup>(10.0)</sup> | 0.396 <sup>(5.0)</sup> | 0.344 <sup>(9.0)</sup>  | 0.466 <sup>(2.0)</sup> | 0.453 <sup>(3.0)</sup> | 0.445 <sup>(4.0)</sup> | 0.204 <sup>(11.0)</sup> | 0.388 <sup>(6.0)</sup> | /           | /             |
| Data 4       | 0.525 <sup>(2.0)</sup> | 0.508 <sup>(5.0)</sup> | 0.511 <sup>(4.0)</sup> | 0.415 <sup>(9.0)</sup>  | 0.440 <sup>(8.0)</sup> | 0.253 <sup>(11.0)</sup> | 0.503 <sup>(6.0)</sup> | 0.521 <sup>(3.0)</sup> | 0.539 <sup>(1.0)</sup> | 0.262 <sup>(10.0)</sup> | 0.463 <sup>(7.0)</sup> | /           | /             |
| Data 5       | 0.548 <sup>(1.0)</sup> | 0.505 <sup>(2.0)</sup> | 0.479 <sup>(3.0)</sup> | 0.382 <sup>(9.0)</sup>  | 0.424 <sup>(8.0)</sup> | 0.323 <sup>(10.0)</sup> | 0.477 <sup>(4.5)</sup> | 0.474 <sup>(6.0)</sup> | 0.477 <sup>(4.5)</sup> | 0.225 <sup>(11.0)</sup> | 0.427 <sup>(7.0)</sup> | /           | /             |
| Data 6       | 0.533 <sup>(1.0)</sup> | 0.449 <sup>(6.0)</sup> | 0.426 <sup>(7.0)</sup> | 0.377 <sup>(10.0)</sup> | 0.417 <sup>(9.0)</sup> | 0.459 <sup>(4.5)</sup>  | 0.459 <sup>(4.5)</sup> | 0.493 <sup>(2.0)</sup> | 0.464 <sup>(3.0)</sup> | 0.227 <sup>(11.0)</sup> | 0.423 <sup>(8.0)</sup> | /           | /             |
| Data 7       | 0.541 <sup>(1.0)</sup> | 0.523 <sup>(2.0)</sup> | 0.466 <sup>(6.0)</sup> | 0.389 <sup>(10.0)</sup> | 0.417 <sup>(9.0)</sup> | 0.447 <sup>(7.0)</sup>  | 0.475 <sup>(5.0)</sup> | 0.500 <sup>(3.0)</sup> | 0.492 <sup>(4.0)</sup> | 0.225 <sup>(11.0)</sup> | 0.431 <sup>(8.0)</sup> | /           | /             |
| Data 8       | 0.535 <sup>(1.0)</sup> | 0.521 <sup>(3.0)</sup> | 0.508 <sup>(4.0)</sup> | 0.425 <sup>(8.0)</sup>  | 0.413 <sup>(9.0)</sup> | 0.360 <sup>(10.0)</sup> | 0.486 <sup>(6.0)</sup> | 0.492 <sup>(5.0)</sup> | 0.522 <sup>(2.0)</sup> | 0.216 <sup>(11.0)</sup> | 0.441 <sup>(7.0)</sup> | /           | /             |
| Graph Data   | /                      | /                      | /                      | /                       | /                      | /                       | /                      | /                      | /                      | /                       | /                      | 0.450       | 0.414         |
| Average Rank | (2.4)                  | (4.1)                  | (5.0)                  | (9.3)                   | (8.0)                  | (9.1)                   | (4.9)                  | (3.3)                  | (2.6)                  | (10.8)                  | (6.7)                  | /           | /             |

Table S5. Performance comparison of all algorithms based on Gmean, related to Figure 2.

|              | ForSyn                 | Original DF            | DCE-DForest             | Deep Synergy            | MatchMaker             | TranSynergy             | SynPathy               | XGBoost                | Random Forest          | RUS Boost              | Balanced Bagging       | DeepDDS-GCN | DeepDDS-S-GAT |
|--------------|------------------------|------------------------|-------------------------|-------------------------|------------------------|-------------------------|------------------------|------------------------|------------------------|------------------------|------------------------|-------------|---------------|
| Data 1       | 0.729 <sup>(1.0)</sup> | 0.594 <sup>(9.0)</sup> | 0.559 <sup>(10.0)</sup> | 0.453 <sup>(11.0)</sup> | 0.651 <sup>(4.5)</sup> | 0.615 <sup>(8.0)</sup>  | 0.622 <sup>(6.0)</sup> | 0.651 <sup>(4.5)</sup> | 0.621 <sup>(7.0)</sup> | 0.718 <sup>(2.0)</sup> | 0.700 <sup>(3.0)</sup> | /           | /             |
| Data 2       | 0.743 <sup>(1.0)</sup> | 0.565 <sup>(9.0)</sup> | 0.581 <sup>(7.0)</sup>  | 0.391 <sup>(10.0)</sup> | 0.623 <sup>(5.0)</sup> | 0.221 <sup>(11.0)</sup> | 0.568 <sup>(8.0)</sup> | 0.661 <sup>(4.0)</sup> | 0.618 <sup>(6.0)</sup> | 0.724 <sup>(2.0)</sup> | 0.715 <sup>(3.0)</sup> | /           | /             |
| Data 3       | 0.646 <sup>(1.0)</sup> | 0.459 <sup>(9.0)</sup> | 0.442 <sup>(10.0)</sup> | 0.381 <sup>(11.0)</sup> | 0.616 <sup>(3.0)</sup> | 0.600 <sup>(4.0)</sup>  | 0.573 <sup>(6.0)</sup> | 0.565 <sup>(7.0)</sup> | 0.529 <sup>(8.0)</sup> | 0.64 <sup>(2.0)</sup>  | 0.595 <sup>(5.0)</sup> | /           | /             |
| Data 4       | 0.752 <sup>(1.0)</sup> | 0.602 <sup>(9.0)</sup> | 0.591 <sup>(10.0)</sup> | 0.477 <sup>(11.0)</sup> | 0.660 <sup>(6.0)</sup> | 0.710 <sup>(3.0)</sup>  | 0.619 <sup>(8.0)</sup> | 0.663 <sup>(5.0)</sup> | 0.632 <sup>(7.0)</sup> | 0.719 <sup>(2.0)</sup> | 0.705 <sup>(4.0)</sup> | /           | /             |
| Data 5       | 0.711 <sup>(1.0)</sup> | 0.587 <sup>(7.0)</sup> | 0.554 <sup>(10.0)</sup> | 0.451 <sup>(11.0)</sup> | 0.643 <sup>(4.0)</sup> | 0.647 <sup>(3.0)</sup>  | 0.599 <sup>(6.0)</sup> | 0.586 <sup>(8.0)</sup> | 0.565 <sup>(9.0)</sup> | 0.664 <sup>(2.0)</sup> | 0.631 <sup>(5.0)</sup> | /           | /             |
| Data 6       | 0.685 <sup>(2.0)</sup> | 0.536 <sup>(9.0)</sup> | 0.501 <sup>(10.0)</sup> | 0.448 <sup>(11.0)</sup> | 0.636 <sup>(5.0)</sup> | 0.710 <sup>(1.0)</sup>  | 0.578 <sup>(7.0)</sup> | 0.602 <sup>(6.0)</sup> | 0.549 <sup>(8.0)</sup> | 0.664 <sup>(3.0)</sup> | 0.651 <sup>(4.0)</sup> | /           | /             |
| Data 7       | 0.714 <sup>(2.0)</sup> | 0.601 <sup>(7.0)</sup> | 0.543 <sup>(10.0)</sup> | 0.464 <sup>(11.0)</sup> | 0.637 <sup>(5.0)</sup> | 0.764 <sup>(1.0)</sup>  | 0.594 <sup>(8.0)</sup> | 0.607 <sup>(6.0)</sup> | 0.575 <sup>(9.0)</sup> | 0.658 <sup>(3.0)</sup> | 0.657 <sup>(4.0)</sup> | /           | /             |
| Data 8       | 0.722 <sup>(1.0)</sup> | 0.616 <sup>(6.0)</sup> | 0.594 <sup>(10.0)</sup> | 0.503 <sup>(11.0)</sup> | 0.636 <sup>(5.0)</sup> | 0.697 <sup>(2.0)</sup>  | 0.615 <sup>(7.0)</sup> | 0.603 <sup>(9.0)</sup> | 0.609 <sup>(8.0)</sup> | 0.654 <sup>(4.0)</sup> | 0.665 <sup>(3.0)</sup> | /           | /             |
| Graph Data   | /                      | /                      | /                       | /                       | /                      | /                       | /                      | /                      | /                      | /                      | /                      | 0.649       | 0.586         |
| Average Rank | (1.3)                  | (8.1)                  | (9.6)                   | (10.9)                  | (4.7)                  | (4.1)                   | (7.0)                  | (6.2)                  | (7.8)                  | (2.5)                  | (3.9)                  | /           | /             |

Table S6. Critical values for the two-tailed Nemenyi test in this study, related to STAR Methods.

| #Num of algorithms | 2     | 3     | 4     | 5     | 6     | 7     | 8     | 9     | 10    | 11    |
|--------------------|-------|-------|-------|-------|-------|-------|-------|-------|-------|-------|
| $q_{0.05}$         | 1.960 | 2.343 | 2.569 | 2.728 | 2.850 | 2.949 | 3.031 | 3.102 | 3.164 | 3.219 |
| $q_{0.10}$         | 1.645 | 2.052 | 2.291 | 2.459 | 2.589 | 2.693 | 2.780 | 2.855 | 2.920 | 2.978 |

Table S7. The performance of all models on the leave-cell-line-out, leave-drug-out, and leave-drug-combination-out cross validation, related to STAR Methods.

|                            | F1-score     | AUPR         | Recall       | MCC          | Gmean        |
|----------------------------|--------------|--------------|--------------|--------------|--------------|
| Leave-cell-line-out        |              |              |              |              |              |
| ForSyn                     | <b>0.361</b> | <b>0.454</b> | 0.328        | <b>0.311</b> | 0.387        |
| Original DF                | 0.201        | 0.398        | 0.181        | 0.165        | 0.243        |
| DCE-DForest                | 0.198        | 0.435        | 0.134        | 0.165        | 0.254        |
| DeepSynergy                | 0.107        | Nan          | 0.091        | 0.072        | 0.160        |
| Matchmaker                 | 0.256        | Nan          | 0.263        | 0.170        | 0.349        |
| TranSynergy                | 0.334        | 0.447        | 0.310        | 0.181        | 0.352        |
| SynPathy                   | 0.141        | Nan          | 0.092        | 0.135        | 0.211        |
| XGBoost                    | 0.135        | 0.354        | 0.091        | 0.139        | 0.177        |
| Random Forest              | 0.163        | 0.385        | 0.114        | 0.119        | 0.215        |
| RUS Boost                  | 0.201        | 0.238        | <b>0.355</b> | 0.062        | 0.294        |
| Balanced Bagging           | 0.265        | 0.263        | 0.265        | 0.135        | 0.366        |
| DeepDDS-GCN                | 0.237        | Nan          | 0.221        | 0.149        | <b>0.394</b> |
| DeepDDS-GAT                | 0.128        | Nan          | 0.137        | 0.082        | 0.295        |
| Leave-drug-out             |              |              |              |              |              |
| ForSyn                     | <b>0.306</b> | <b>0.356</b> | 0.247        | <b>0.339</b> | 0.467        |
| Original DF                | 0.299        | 0.319        | 0.208        | 0.263        | 0.429        |
| DCE-DForest                | 0.297        | 0.344        | 0.203        | 0.329        | 0.422        |
| DeepSynergy                | 0.233        | 0.328        | 0.148        | 0.284        | 0.362        |
| Matchmaker                 | 0.301        | 0.315        | 0.246        | 0.264        | 0.471        |
| TranSynergy                | 0.303        | 0.352        | 0.312        | 0.275        | <b>0.513</b> |
| SynPathy                   | 0.274        | 0.332        | 0.189        | 0.281        | 0.410        |
| XGBoost                    | 0.183        | 0.296        | 0.114        | 0.221        | 0.315        |
| Random Forest              | 0.284        | 0.333        | 0.203        | 0.292        | 0.417        |
| RUS Boost                  | 0.196        | 0.151        | <b>0.333</b> | 0.092        | 0.491        |
| Balanced Bagging           | 0.255        | 0.254        | 0.257        | 0.193        | 0.455        |
| DeepDDS-GCN                | 0.252        | 0.340        | 0.230        | 0.215        | 0.447        |
| DeepDDS-GAT                | 0.187        | 0.248        | 0.147        | 0.186        | 0.301        |
| Leave-drug-combination-out |              |              |              |              |              |
| ForSyn                     | <b>0.381</b> | <b>0.438</b> | 0.332        | <b>0.428</b> | 0.559        |
| Original DF                | 0.352        | 0.425        | 0.236        | 0.400        | 0.470        |
| DCE-DForest                | 0.372        | 0.406        | 0.250        | 0.356        | 0.487        |
| DeepSynergy                | 0.303        | 0.369        | 0.191        | 0.379        | 0.423        |
| sMatchmaker                | 0.356        | 0.381        | 0.296        | 0.343        | 0.519        |
| TranSynergy                | <b>0.382</b> | 0.432        | 0.337        | 0.390        | <b>0.599</b> |
| SynPathy                   | 0.367        | 0.409        | 0.253        | 0.411        | 0.494        |

|                  |       |       |              |       |       |
|------------------|-------|-------|--------------|-------|-------|
| XGBoost          | 0.308 | 0.374 | 0.206        | 0.341 | 0.448 |
| Random Forest    | 0.362 | 0.419 | 0.238        | 0.425 | 0.477 |
| RUS Boost        | 0.209 | 0.187 | <b>0.431</b> | 0.153 | 0.581 |
| Balanced Bagging | 0.332 | 0.346 | 0.328        | 0.299 | 0.552 |
| DeepDDS-GCN      | 0.317 | 0.406 | 0.278        | 0.305 | 0.502 |
| DeepDDS-GAT      | 0.231 | 0.319 | 0.190        | 0.250 | 0.358 |

Table S8. Ablation experiment of deep forest based on Data 8 and F1-score metric, related to STAR Methods.

| Configuration                            | Description                                            | F1-score |
|------------------------------------------|--------------------------------------------------------|----------|
| DF(ADA*1+BAG*1+GBC *1+RF-CUS*1+ETF-DR*1) | Five different units are placed on each cascade layer. | 0.562    |
| DF(ADA*1+BAG*1+GBC *1+RF-CUS*1)          | Remove ETF-DR unit.                                    | 0.532    |
| DF(ADA*1+BAG*1+GBC *1+ ETF-DR*1)         | Remove RF-CUS unit.                                    | 0.537    |
| DF(ADA*1+BAG*1+RF-CUS*1+ETF-DR*1)        | Remove GBC unit.                                       | 0.553    |
| DF(ADA*1+GBC *1+RF-CUS*1+ETF-DR*1)       | Remove BAG unit.                                       | 0.558    |
| DF(BAG*1+GBC *1+RF-CUS*1+ETF-DR*1)       | Remove ADA unit.                                       | 0.554    |

Table S9. The top eight synergistic drug combinations predicted by ForSyn, related to Figure 3.

| Drug A                  | Drug B      | Cell Line | Verified |
|-------------------------|-------------|-----------|----------|
| Erlotinib Hydrochloride | Azd1775     | HT29      | √        |
| Erlotinib Hydrochloride | Mk-5108     | HT29      | √        |
| Erlotinib Hydrochloride | Mk-2206     | HT29      |          |
| Etoposide               | Gefitinib   | HT29      | √        |
| Erlotinib Hydrochloride | Dinaciclib  | HT29      | √        |
| Erlotinib Hydrochloride | Pd325901    | HT29      |          |
| Erlotinib Hydrochloride | Bez-235     | HT29      |          |
| Azd1775                 | Vemurafenib | SW620     |          |

Table S10. The genes involved in the top contributing DGE features in four cell lines, related to Figure 4.

| Index | A549 cell line | HT29 cell line | MCF7 cell line | PC3 cell line |
|-------|----------------|----------------|----------------|---------------|
| 1     | CCND3          | PLOD3          | PGM1           | UFM1          |
| 2     | TSPAN4         | CAMSAP2        | SPRED2         | SIRT3         |
| 3     | CLPX           | INSIG1         | EIF4G1         | RPA1          |
| 4     | PRUNE1         | GNA15          | CEMIP2         | NSDHL         |
| 5     | ELAVL1         | SKIV2L         | RALA           | AKAP8L        |
| 6     | LPAR2          | MINDY1         | HIF1A          | GRWD1         |
| 7     | HK1            | PCBD1          | TPM1           | NCK1          |
| 8     | GNA11          | FOXO3          | BNIP3L         | COG4          |
| 9     | NT5DC2         | EPHA3          | FKBP14         | ABHD4         |
| 10    | PYGL           | MTF2           | GOLT1B         | ATF5          |



Data S1. The algorithm of random forest by clustering and stratified under-sampling, related to STAR Methods.

**Input:**

D: a binary training set, which is composed of the majority class ( $D_{maj}$ ) and the minority class ( $D_{min}$ ),  $D = D_{maj} \cup D_{min}$

d: the feature dimension

T: the number of decision trees in the Random Forest

**Output:**

The ensemble of decision trees.

**Algorithm process:**

1: **For**  $t=1,2,\dots,T$  **Do**

2:     Step 1 Perform AP clustering on the majority class ( $D_{maj}$ ).

3:     Step 2 Perform stratified sampling on the clustering result of Step 1, to obtain the dataset  $S_{maj}$ , where  $|S_{maj}| = |D_{min}|$ .

4:     Step 3 Perform bootstrap sampling on the minority class ( $D_{min}$ ) to obtain the dataset  $S_{min}$ , where  $|S_{min}| = |D_{min}|$ .

5:     Step 4  $D_{train} = S_{maj} \cup S_{min}$ .

6:     Step 5 Randomly select  $\sqrt{d}$  features in  $D_{train}$ , to get the dataset  $S_{train}$ .

7:     Step 6 Use  $S_{train}$  to train a decision tree.

8: **End For**

Data S2. The algorithm of extreme tree forest based on data complexity dimension reduction, related to STAR Methods.

**Input:**

D: the overall dataset

d: the feature dimension

T: the training set

V: the validation set //D=T ∪ V

R: the number of iteration //R = 5 in the experiment

s: the step size of the greedy algorithm

size: the feature size after dimension reduction

ETF: an extreme tree forest

**Output:**

Feature subset after dimension reduction, and a trained ETF.

**Algorithm process:**

1: Use data complexity metric to calculate the overlap area ( $F_i$ ) of each feature in D. // Refer to Eq. (1)

2: Sort all the features in D by ascending order according to  $F_i$ .

3: Divide D into R subsets evenly,  $D_r \subset D$ ,  $r \in [1, R]$ .

4: Initialize Size=0.

5: **For** r in Range R

6: T=D\  $D_r$  // (R-1) subsets as the training set

7: V= $D_r$  // One subset as the validation set

8: ACC=Accuracy(ETF, T, V)

// Use T to train the extreme tree forest, then use V to verify its performance

9: Initialize BestSubset= $\emptyset$ , ACC<sub>max</sub>= ACC

10: **While** T $\neq \emptyset$  **Do**

11: T = T[: , : (d-s)] // Training set removes the last s dimension

12: V= V[: , : (d-s)] // Validation set removes the last s dimension

13: ACC<sub>temp</sub>= Accuracy(ETF, T, V)

14: **If** ACC<sub>temp</sub> > ACC<sub>max</sub> **Then**

15: ACC<sub>max</sub>= ACC<sub>temp</sub>

16: BestSubset=T

17: **Else Break**

18: **End While**

19: size=size+|BestSubset| // |\*| represents the dimension of the set

20: **End For**

21: size= size/R

22: **Return** D[: , : size] // Return the feature subset after dimension reduction

23: Using D[: , : size] to train a ETF as the unit of the deep forest.
